# Supplementary material for: A New Threat to Honey Bees, the Parasitic Phorid Fly Apocephalus borealis
Source: PubMed Central journal article supplement (PMC3250467; doi:10.1371/journal.pone.0029639), 2012-01-03
Supplement: pone.0029639.s002.pdf [file pone.0029639.s002.pdf]

**Figure S2. *Apocephalus borealis* 18S rRNA and mitochondrial cytochrome oxidase I (COI) DNA sequence used for barcoding and APM.**

>Phorid\_rRNA\_Consensus

GGAATGAGWACACTTTTAAATCCTTTAACAAGGACCTATTGGAGGGCAAGTCTGGTGCCA  
GCAGCCGCGTAATTCCAGCTCCAATAGCGTATATTAAAGTTGTTGCGGTTAAAACGTT  
CGTAGTTGAACTTGTGCTCCATACGGGTAGTACACCTATACATTGGGTTCGTACATTAC  
TCTATGGTATGTGAGCGTATTACCGGTGGAGTTCTTATATGTAATAGTACTTGTATTAT  
TGCATATTCCTCCTATTCAAACCTACTTCMGTGCTCTTCACCGAGTGTTGTTGTGGGCC  
GGTACAATTACTTTGAACAAATTAGAGTGCTTAAAGCAGGCTTCAAATGCCTGAATATT  
TGTGCATGGAATAATGGAATAAGACCTCTGTTCTACTTTCATTGGTTTATAGATCAAGA  
GGTAATGATTAATAGAAGCAGTTTGGGGGCATTAGTATTACGACGCGAGAGGTGAAATT  
CTTGGACCGTCGTAAGACTAACTTAAGCGAAAGCATTGCCAAAGATGTTTTCATTAAT  
CAAGAACGAAAGTTAGAGGTTTCGAAGGCGATCAGATACCGCCCTAGTTCTAACCATAAA  
CGATGCCAGCTAGCAATTGGGTGTAGCTACTTTTATGGCYCTCTCAGTCGCTTCCCGGG  
AAACCAAAGCTTTTGGGCTCCGGGGGAAGTATGGTTGCAAAGCTGAAACTTAAAGGAAT  
TGACGGAAGGGCACCACCAGGAGTGGAGCCTGCGGCTTAATTTGACTCAACACGGGAAA  
ACTTACCAGGTCCGAACATAAATGAGTAWGACAGATTGATAGCTCTTCTCGAATCTAT  
GGGTGGTGGTGCATGGCCGTTCTTAGTTCGTGGAGTGATTTGTCTGGTTAATTCCGATA  
AYGAACGAGACTCAAATATATTAAATAGATGCTTTCAGGATTATAGCGTTGAAACTTAT  
ATATCGGTTCRGCATGAATGCAGTAACATGTCCTAGTGTTTGATTTGATTATATARGTGG  
AGTTGTACCTGTTGGTTTGTCCATTATAAGGACACTAGCTTCTTAAATGGACAAATTG  
CGTCTAGCAATAATGAGATTGAGCAATAACAGGTCTGTGATGCCCTTAGATGTCCTGGG  
CTGCACGCGCGCTACAATGAAAGTATCAACGTGTATTTCTAGACCGAGAGGTCCGGGT  
AAACCGCTGAACCACTTTCTTGCTTGGGATTGTGAACTGAACTGTTTACATGAACCTG  
GAATCCCAGTAAGTGTGAGTCATTAACTCGCATTGATTACGTCCCTGC

>Phorid\_COI

TTATCCAGATGCTTATACCTCCTGAAATATTATCTCCTCTATTGGTTCATATGTTTCAT  
TTTTAAGAATTATCTTTTTCTTATATATTATCTGAGAAAGAATAACTTCACAACGTCTA  
CTTATTACCCCTTCACAAATAAGTTCATCTATTGAATGATACCAAATACTCCTCCCTC  
TGAACATAGTTATTCTGAACTACCTTTATTAACAAATTAAATCTAACGTGGCAGATTAG  
TGCAATGGATTTAAGCTCCAAATATAAAGTATTTAACTTTCATTAGAACACAAATGTCA  
ACTTGAGCTAATTTAAATTTACAAGATAGTGCATCACCATTAATAGAACAATTAACCTT  
CTTTCATGATCATACTATTAATTTTAGTATTAATTACTGTTTTAGTTTCTTATATAA  
TATCAATTTTATTTTTTAACAGTTTCTCAAATCGATTCTTGTTACACGGACAAATAATT  
GAAATCATTTGAACTATTCTACCAGCTATAACTTTGTTATTCATTGCTTTTCCCTCTCT  
TCGTCTATTATATTTAATTGACGAAATTAATGAACCAATAATTACCTTAAAATCAATTG  
GCCAC
