# Supplementary material for: A New Threat to Honey Bees, the Parasitic Phorid Fly Apocephalus borealis
Source: PubMed Central journal article supplement (PMC3250467; doi:10.1371/journal.pone.0029639), 2012-01-03
Supplement: pone.0029639.s006.pdf [file pone.0029639.s006.pdf]

**Table S1. Honey bee and bumble bee collection sites in the San Francisco Bay Area.** Locations of hives which did not yield parasitism in the San Francisco Bay Area are shaded light grey. Locations where stranded and foraging honey bees and bumble bees were collected are shaded dark grey.

| Location                                                              | County        | Species             | # Bees Sampled | Phorids Detected | Notes                                                  |
|-----------------------------------------------------------------------|---------------|---------------------|----------------|------------------|--------------------------------------------------------|
| SF State, Hensill Hall, 94132                                         | San Francisco | <i>A. mellifera</i> | 2174           | +                | Sampled from under lights, adjacent to main study hive |
|                                                                       |               |                     | 435            | +                | Sampled from enclosures on main study hive             |
|                                                                       |               |                     | 795            | +                | Sampled from main study hive                           |
| SF State 5 <sup>th</sup> Floor Stairwell Breezeway Hensill Hall 94132 | San Francisco | <i>A. mellifera</i> | 18             | +                | Sampled from under lights                              |
| SF State, Hensill Hall, Greenhouse 94132                              | San Francisco | <i>A. mellifera</i> | 574            | +                | Sampled from under lights at greenhouse                |
| SF State, Hensill Hall, Observation Hive 94132                        | San Francisco | <i>A. mellifera</i> | 30             | +                | Sampled bees from within hive entrance                 |
| SF State, Feral Hive, Hensill Hall 94132                              | San Francisco | <i>A. mellifera</i> | 20             | +                | Sampled from under lights near hive                    |
| Golden Gate Park (GGP) Apiary 94122                                   | San Francisco | <i>A. mellifera</i> | 16             | +                | Sampled from area around hives                         |
| Heron's Head Park 94124                                               | San Francisco | <i>A. mellifera</i> | 213            | +                | Sampled foragers                                       |
| Van Buren St. 94131                                                   | San Francisco | <i>A. mellifera</i> | 323            | +                | Sampled foragers and from area around hives            |
| 17 <sup>th</sup> St. and Dolores 94110                                | San Francisco | <i>A. mellifera</i> | 36             | +                | Sampled from area around hives                         |
| Laguna and Oak 94102                                                  | San Francisco | <i>A. mellifera</i> | 81             | +                | Enclosure and sampled foragers                         |
| 7 <sup>th</sup> St. and Lawton 94122                                  | San Francisco | <i>A. mellifera</i> | 88             | +                | Sampled foragers -                                     |
| 12 <sup>th</sup> St. and Lake 94118                                   | San Francisco | <i>A. mellifera</i> | 247            | +                | Sampled foragers and light trap                        |
| Hickory and Octavia 94102                                             | San Francisco | <i>A. mellifera</i> | 36             | +                | Sampled foragers                                       |
| Mizpah St. and Sussex 94131                                           | San Francisco | <i>A. mellifera</i> | 5              | +                | Collected in a light trap                              |
| SF Insect Zoo 94132                                                   | San Francisco | <i>A. mellifera</i> | 5              | +                | Sampled from area around hive                          |

|                                            |               |                     |     |   |                                             |
|--------------------------------------------|---------------|---------------------|-----|---|---------------------------------------------|
| El Sobrante, CA 94803                      | Contra Costa  | <i>A. mellifera</i> | 288 | + | Sampled foragers and from area around hives |
| Walnut Creek, CA 94595                     | Contra Costa  | <i>A. mellifera</i> | 326 | + | Sampled foragers and from area around hives |
| Mill Valley, CA 94941                      | Marin         | <i>A. mellifera</i> | 414 | + | Sampled foragers and from area around hives |
| Orinda, CA 94563                           | Contra Costa  | <i>A. mellifera</i> | 340 | + | Sampled foragers and from area around hives |
| Rio Vista, CA 94571                        | Solano        | <i>A. mellifera</i> | 248 | + | Sampled foragers                            |
| Pleasant Hill, CA 94523                    | Contra Costa  | <i>A. mellifera</i> | 196 | + | Sampled foragers                            |
| Oakland, CA 94601                          | Alameda       | <i>A. mellifera</i> | 254 | + | Sampled foragers and from area around hives |
| Oakland, CA 94602                          | Alameda       | <i>A. mellifera</i> | 295 | + | Sampled foragers and from area around hives |
| Concord, CA 94519                          | Contra Costa  | <i>A. mellifera</i> | 185 | + | Sampled foragers and from area around hives |
| Martinez, CA 94553                         | Contra Costa  | <i>A. mellifera</i> | 344 | + | Sampled foragers and from area around hives |
| 26 <sup>th</sup> St. and Douglass<br>94114 | San Francisco | <i>A. mellifera</i> | 61  | - | Sampled foragers and from area around hives |
| Bryant and 26 <sup>th</sup> St. 94110      | San Francisco | <i>A. mellifera</i> | 73  | - | Sampled foragers and from area around hives |
| Islais Creek Park 94124                    | San Francisco | <i>A. mellifera</i> | 71  | - | Sampled foragers and from area around hives |
| Alamo, CA 94507                            | Contra Costa  | <i>A. mellifera</i> | 78  | - | Sampled foragers and from area around hives |
| San Ramon, CA 94583                        | Contra Costa  | <i>A. mellifera</i> | 56  | - | Samples from area around hives              |
| San Jose, CA 95127                         | Santa Clara   | <i>A. mellifera</i> | 480 | - | Sampled foragers                            |
| Antioch, CA 94509                          | Contra Costa  | <i>A. mellifera</i> | 41  | - | Sampled foragers and from area around hives |

|                                            |               |                            |    |   |                               |
|--------------------------------------------|---------------|----------------------------|----|---|-------------------------------|
| McLaren Park 94134                         | San Francisco | <i>A. mellifera</i>        | 28 | + | Sampled foragers              |
| Clarendon St. 94131                        | San Francisco | <i>A. mellifera</i>        | 19 | + | Discovered stranded on ground |
| JFK Drive (GGP) 94122                      | San Francisco | <i>A. mellifera</i>        | 1  | + | Discovered stranded on ground |
| Sutro Tower 94131                          | San Francisco | <i>A. mellifera</i>        | 2  | + | Discovered stranded on ground |
| SF State, Hensill Hall Greenhouse 94132    | San Francisco | <i>Bombus vosnesenskii</i> | 4  | + | Sampled foragers              |
| 19 <sup>th</sup> Ave. and Vicente 94116    | San Francisco | <i>Bombus vosnesenskii</i> | 45 | + | Sampled foragers              |
| Lake Merced 94132                          | San Francisco | <i>Bombus vosnesenskii</i> | 47 | + | Sampled foragers              |
| 14 <sup>th</sup> Ave. and Balboa 94118     | San Francisco | <i>Bombus vosnesenskii</i> | 10 | + | Sampled foragers              |
| McLaren Park 94134                         | San Francisco | <i>Bombus vosnesenskii</i> | 19 | + | Sampled foragers              |
| Mizpah St. and Sussex 94131                | San Francisco | <i>Bombus vosnesenskii</i> | 1  | + | Sampled foragers              |
| Quintara St. and Cragmont 94116            | San Francisco | <i>A. mellifera</i>        | 1  | - | Discovered stranded on ground |
| Glen Canyon Park 94131                     | San Francisco | <i>A. mellifera</i>        | 5  | - | Discovered stranded on ground |
| 12 <sup>th</sup> St. and Fulton 94118      | San Francisco | <i>A. mellifera</i>        | 1  | - | Discovered stranded on ground |
| Glen Canyon Park 94131                     | San Francisco | <i>Bombus vosnesenskii</i> | 2  | - | Sampled foragers              |
| 8 <sup>th</sup> Ave. and Lake 94118        | San Francisco | <i>Bombus vosnesenskii</i> | 18 | - | Sampled foragers              |
| California Academy of Sciences (GGP) 94118 | San Francisco | <i>Bombus vosnesenskii</i> | 29 | - | Sampled foragers              |
| Carl St. and Arguello 94122                | San Francisco | <i>Bombus vosnesenskii</i> | 1  | - | Sampled foragers              |
| 17 <sup>th</sup> Ave. and Stanyan 94117    | San Francisco | <i>Bombus vosnesenskii</i> | 1  | - | Sampled foragers              |
| 8 <sup>th</sup> Ave. and Lake 94118        | San Francisco | <i>Bombus melanopygus</i>  | 8  | + | Sampled foragers              |
| California Academy of Sciences (GGP) 94118 | San Francisco | <i>Bombus melanopygus</i>  | 3  | - | Sampled foragers              |

|                                            |                  |                               |   |   |                  |
|--------------------------------------------|------------------|-------------------------------|---|---|------------------|
| 12 <sup>th</sup> Ave. and Fulton<br>94118  | San<br>Francisco | <i>Bombus<br/>melanopygus</i> | 1 | - | Sampled foragers |
| Belgrave St. and Stanyan<br>94112          | San<br>Francisco | <i>Bombus<br/>melanopygus</i> | 1 | - | Sampled foragers |
| McLaren Park 94134                         | San<br>Francisco | <i>Bombus<br/>melanopygus</i> | 1 | - | Sampled foragers |
| 19 <sup>th</sup> Ave. and Vicente<br>94116 | San<br>Francisco | <i>Bombus<br/>melanopygus</i> | 4 | - | Sampled foragers |
