# Supplementary material for: A New Threat to Honey Bees, the Parasitic Phorid Fly Apocephalus borealis
Source: PubMed Central journal article supplement (PMC3250467; doi:10.1371/journal.pone.0029639), 2012-01-03
Supplement: pone.0029639.s007.pdf [file pone.0029639.s007.pdf]

**Table S2. Arthropod Pathogen Microarray results.** Location codes are main study hive (HHH), stranded on landing near main hive (HHL), main hive enclosure (HHC), observation hive (OH), near feral hive on San Francisco State University campus (GYMA), feral hive near California Academy of Sciences (CAS), X's indicate whether infected by phorids, *Nosema ceranae*, or deformed wing virus.

| Description | <i>Apocephalus borealis</i> | <i>Nosema ceranae</i> | Deformed Wing Virus | Location | Date         |
|-------------|-----------------------------|-----------------------|---------------------|----------|--------------|
| Honey bee   | X                           | X                     | X                   | OH       | Apr 23, 2010 |
| Honey bee   |                             |                       |                     | OH       | Apr 23, 2010 |
| Honey bee   |                             |                       |                     | OH       | Apr 23, 2010 |
| Honey bee   |                             |                       | X                   | OH       | Apr 23, 2010 |
| Honey bee   |                             |                       |                     | OH       | Apr 23, 2010 |
| Honey bee   |                             | X                     |                     | HHL      | Apr 26, 2010 |
| Honey bee   |                             | X                     |                     | HHL      | Apr 26, 2010 |
| Honey bee   |                             | X                     |                     | HHL      | Apr 26, 2010 |
| Honey bee   | X                           | X                     | X                   | HHL      | May 3, 2010  |
| Honey bee   | X                           | X                     | X                   | HHH      | May 26, 2010 |
| Honey bee   |                             | X                     |                     | HHH      | May 26, 2010 |
| Honey bee   |                             | X                     |                     | HHH      | May 26, 2010 |
| Honey bee   | X                           | X                     | X                   | HHC      | May 27, 2010 |
| Honey bee   | X                           | X                     | X                   | HHC      | May 27, 2010 |
| Honey bee   |                             | X                     |                     | HHC      | May 27, 2010 |
| Honey bee   |                             | X                     |                     | HHC      | May 27, 2010 |
| Honey bee   |                             | X                     |                     | HHC      | May 27, 2010 |
| Honey bee   |                             |                       |                     | HHL      | May 28, 2010 |
| Honey bee   |                             |                       |                     | HHL      | May 28, 2010 |
| Honey bee   |                             | X                     | X                   | GYMA     | June 2, 2010 |
| Honey bee   |                             | X                     |                     | GYMA     | June 2, 2010 |
| Honey bee   |                             | X                     | X                   | CAS      | June 2, 2010 |
| Honey bee   |                             |                       | X                   | CAS      | June 2, 2010 |
| Honey bee   |                             | X                     | X                   | CAS      | June 2, 2010 |
| Honey bee   |                             | X                     | X                   | CAS      | June 2, 2010 |
| Honey bee   |                             | X                     | X                   | CAS      | June 2, 2010 |
| Honey bee   | X                           | X                     |                     | HHH      | June 7, 2010 |
| Honey bee   | X                           | X                     | X                   | HHH      | June 7, 2010 |

|              |   |   |   |                  |                |
|--------------|---|---|---|------------------|----------------|
| Honey bee    | X | X | X | HHL              | June 8, 2010   |
| Honey bee    |   |   |   | HHL              | June 8, 2010   |
| Honey bee    |   |   |   | HHL              | June 8, 2010   |
| Honey bee    |   |   |   | HHL              | June 8, 2010   |
| Honey bee    |   | X |   | HHL              | June 18, 2010  |
| Honey bee    |   | X | X | HHL              | June 2010      |
| Honey bee    | X | X | X | HHH              | June 2010      |
| Honey bee    | X | X |   | HHL              | June 2010      |
| Phorid Adult | X |   |   | Raised from Bee  | April 12, 2010 |
| Phorid Adult | X |   |   | Raised from Bee  | April 12, 2010 |
| Phorid Larva | X | X |   | Emerged from Bee | May 3, 2010    |
| Phorid Larva | X | X | X | Emerged from Bee | May 3, 2010    |
| Phorid Larva | X |   | X | Emerged from Bee | May 3, 2010    |
| Phorid Adult | X | X |   | Raised from Bee  | May 11, 2010   |
| Phorid Larva | X | X |   | Emerged from Bee | May 17, 2010   |
| Phorid Larva | X | X | X | Emerged from Bee | May 17, 2010   |
| Phorid Larva | X | X | X | Emerged from Bee | May 17, 2010   |
| Phorid Larva | X | X | X | Emerged from Bee | May 17, 2010   |
| Phorid Larva | X | X | X | Emerged from Bee | May 17, 2010   |
| Phorid Adult | X | X | X | Raised from Bee  | May 22, 2010   |
| Phorid Adult | X | X |   | Raised from Bee  | May 22, 2010   |
| Phorid Adult | X |   |   | Raised from Bee  | May 2010       |
| Phorid Adult | X |   | X | Raised from Bee  | May 2010       |
| Phorid Adult | X | X |   | Raised from Bee  | May 2010       |
