# Supplementary material for: A New Threat to Honey Bees, the Parasitic Phorid Fly Apocephalus borealis
Source: PubMed Central journal article supplement (PMC3250467; doi:10.1371/journal.pone.0029639), 2012-01-03
Supplement: pone.0029639.s008.pdf [file pone.0029639.s008.pdf]

**Table S3. Rate of parasitism for *Bombus vosnesenskii* sampled from San Francisco, California locations from May to November 2010.**

| Date of Collection | Rate of Parasitism | Species                    | # of Bees Sampled |
|--------------------|--------------------|----------------------------|-------------------|
| 24-May-10          | 0.21               | <i>Bombus vosnesenskii</i> | 19                |
| 3-Jun-10           | 0.23               | <i>Bombus vosnesenskii</i> | 13                |
| 15-Jun-10          | 0.18               | <i>Bombus vosnesenskii</i> | 11                |
| 24-Jun-10          | 0.14               | <i>Bombus vosnesenskii</i> | 7                 |
| 28-Jun-10          | 0.20               | <i>Bombus vosnesenskii</i> | 10                |
| 1-Sep-10           | 0.80               | <i>Bombus vosnesenskii</i> | 10                |
| 28-Nov-10          | 1.00               | <i>Bombus vosnesenskii</i> | 1                 |
